# Supplementary material for: Predicting Eucalyptus Diameter at Breast Height and Total Height with UAV-Based Spectral Indices and Machine Learning
Source: MDPI journal article supplement (doi:10.3390/f12050582), 2021-05-07
Supplement: s1 [file s1]

Table S1 – Equations used to calculate the vegetation indices implemented in the experiments.

| Index                                                   | Equation                                                                                                                                                                             |
|---------------------------------------------------------|--------------------------------------------------------------------------------------------------------------------------------------------------------------------------------------|
| ARVI2 (Atmospherically Resistant Vegetation Index 2)    | $-0.18 + 1.17 * ((R\lambda_{nir} - R\lambda_{red}) / (R\lambda_{nir} + R\lambda_{red}))$                                                                                             |
| ATSAVI (Ajusted Transformed soil-ajusted VI)            | $1.22 * \left[ \frac{(R\lambda_{nir} - 1.22 * R\lambda_{red} - 0.03)}{(1.22 * R\lambda_{nir} + R\lambda_{red} - 1.22 * 0.03 + 0.08(1 + 1.22^2))} \right]$                            |
| BWDRVI (Blue-wide dynamic range vegetation index)       | $0.1 * (R\lambda_{nir} + R\lambda_{red})$                                                                                                                                            |
| CCCI (Canopy Chlorophyll Content Index)                 | $\frac{[(R\lambda_{nir} - R\lambda_{rededge})]}{(R\lambda_{nir} + R\lambda_{rededge})} / \left[ \frac{(R\lambda_{nir} - R\lambda_{red})}{(R\lambda_{nir} + R\lambda_{red})} \right]$ |
| CIgreen (Chlorophyll Index Green)                       | $\frac{(R\lambda_{nir})}{R\lambda_{green}} - 1$                                                                                                                                      |
| CIredEdge (Chlorophyll Index RedEdge)                   | $\frac{(R\lambda_{nir})}{R\lambda_{rededge}} - 1$                                                                                                                                    |
| CVI (Chlorophyll Vegetation Index)                      | $\frac{R\lambda_{nir} * (R\lambda_{red})}{R\lambda_{green}^2}$                                                                                                                       |
| DVI (Difference Vegetation Index)                       | $R\lambda_{nir} / R\lambda_{red}$                                                                                                                                                    |
| EVEI2 (Enhanced Vegetation Index 2)                     | $2.5 * (R\lambda_{nir} - R\lambda_{red}) / (R\lambda_{nir} + 2.4 * R\lambda_{red} + 1)$                                                                                              |
| GDVI (Difference NIR/Green Difference Vegetation Index) | $R\lambda_{nir} - R\lambda_{green}$                                                                                                                                                  |
| GEMI (Global Environment Monitoring Index)              | $2 * (1 - 0.25 * 2) - ((R\lambda_{red} - 0.125) / (1 - R\lambda_{red}))$                                                                                                             |
| GNDVI (Green Normalized Difference Vegetation Index)    | $\frac{(R\lambda_{nir} - R\lambda_{red})}{(R\lambda_{nir} + R\lambda_{red})}$                                                                                                        |
| GRNDVI (Green-Red NDVI)                                 | $[R\lambda_{nir} - (R\lambda_{green} + R\lambda_{red})] / [R\lambda_{nir} + (R\lambda_{green} + R\lambda_{red})]$                                                                    |
| GRVI (Green-Red Vegetation Index)                       | $\frac{(R\lambda_{green} - R\lambda_{red})}{(R\lambda_{green} + R\lambda_{red})}$                                                                                                    |
| GSAVI (Green Soil Adjusted Vegetation Index)            | $[(R\lambda_{nir} - R\lambda_{green}) / (R\lambda_{nir} + R\lambda_{green} + 0.5)] * 1.5$                                                                                            |
| GTVI (Green Triangle Vegetation Index)                  | $(NDVI + 0.5) / (NDVI + 0.5) * [(\sqrt{NDVI} + 0.5)]$                                                                                                                                |
| IPVI (Infrared Percentage Vegetation Index)             | $R\lambda_{nir} / ((R\lambda_{nir} + R\lambda_{red}) / 2) * (NDVI + 1)$                                                                                                              |
| LogR (Log Ratio)                                        | $\text{Log}(R\lambda_{nir} / R\lambda_{red})$                                                                                                                                        |
| MSAVI (Modified Soil Adjusted Vegetation Index)         | $[2 * (R\lambda_{nir} + 1) - \sqrt{(2 * R\lambda_{nir} + 1)^2 - 8 * (R\lambda_{nir} - R\lambda_{red})}] / 2$                                                                         |
| MSRNirRed(Modified Simple Ratio NIR/RED)                | $\frac{(R\lambda_{nir} / R\lambda_{red} - 1)}{\sqrt{(R\lambda_{nir} / R\lambda_{red} + 1)}}$                                                                                         |
| NDRE (Normalized Difference Red-Edge Index)             | $\frac{R\lambda_{nir} - R\lambda_{rededge}}{R\lambda_{nir} + R\lambda_{rededge}}$                                                                                                    |
| NDVI (Normalized Difference Vegetation Index)           | $\frac{(R\lambda_{nir} - R\lambda_{red})}{(R\lambda_{nir} + R\lambda_{red})}$                                                                                                        |
| NGRDI(Normalized Green-Red Difference Index)            | $\frac{(R\lambda_{green} - R\lambda_{red})}{(R\lambda_{green} + R\lambda_{red})}$                                                                                                    |
| NormR1 (Normalized G)                                   | $\frac{R\lambda_{green}}{(R\lambda_{nir} + R\lambda_{red} + R\lambda_{green})}$                                                                                                      |
| NormR2 (Normalized NIR)                                 | $\frac{R\lambda_{nir}}{(R\lambda_{nir} + R\lambda_{red} + R\lambda_{green})}$                                                                                                        |
| NormR3 (Normalized R)                                   | $\frac{R\lambda_{red}}{(R\lambda_{nir} + R\lambda_{red} + R\lambda_{green})}$                                                                                                        |
| RGR (Red Green Ratio Index)                             | $\frac{(R\lambda_{red})}{R\lambda_{green}}$                                                                                                                                          |
| RI (Redness Index)                                      | $R\lambda_{red} - R\lambda_{green} / R\lambda_{red} + R\lambda_{green}$                                                                                                              |
| RRI 1                                                   | $\frac{R\lambda_{nir}}{R\lambda_{rededge}}$                                                                                                                                          |
| TNDVI (Transformed NDVI)                                | $[\sqrt{(R\lambda_{nir} - R\lambda_{red})}] / (R\lambda_{nir} + R\lambda_{red}) + 0.5$                                                                                               |
| SQRT_IR_R                                               | $\sqrt{R\lambda_{nir} / R\lambda_{red}}$                                                                                                                                             |
| SRRed_NIR                                               | $\frac{R\lambda_{red}}{R\lambda_{nir}}$                                                                                                                                              |
| WDRVI(Wide Dynamic Range Vegetation Index)              | $\frac{(0.1 * R\lambda_{nir} - R\lambda_{red})}{(0.1 * R\lambda_{nir} + R\lambda_{red})}$                                                                                            |

NIR = near-infrared.
